# Supplementary material for: Assessing Workplace Health and Safety Strategies, Trends, and Barriers through a Statewide Worksite Survey
Source: MDPI journal article supplement (doi:10.3390/ijerph16142475), 2019-07-11
Supplement: s1 [file s1]

## Supplementary Materials

### Supplementary Table S1. Survey questions on workplace health governance, planning, and safety policies.

The following questions are a selection of questions from a larger 8 page worksite health and wellness questionnaire for employers. A copy of the entire questionnaire can be requested by contacting the contact author.

|                                                                                                                                                                      |
|----------------------------------------------------------------------------------------------------------------------------------------------------------------------|
| <b>Policies supporting health promotion</b>                                                                                                                          |
| <b>Our worksite:</b>                                                                                                                                                 |
| Has a health promotion or wellness committee.                                                                                                                        |
| Has a coordinator that is responsible for employee health promotion or wellness.                                                                                     |
| Has staff that are responsible for employee health promotion or wellness.                                                                                            |
| Has included funding for health promotion or wellness in the budget <i>in the past month</i> .                                                                       |
| Has written objectives for employee wellness or health.                                                                                                              |
| Has a stated mission or goal for our company regarding the improvement of the health status of employees.                                                            |
| Has coordinated programs for occupational health and safety with program for health promotion and wellness                                                           |
| <b>Policies regarding worker safety</b>                                                                                                                              |
| <b>Our worksite:</b>                                                                                                                                                 |
| Has policies that require employees to wear seatbelts while driving a car or operating a moving vehicle while on company business.                                   |
| Has policies that require employees to wear seatbelts while riding in a car or moving vehicle while on company business.                                             |
| Has policies that require employees to refrain from talking on cellular phones while driving a car or operating a moving vehicle while on company business.          |
| Has a policy/policies that require employees to refrain from texting on cellular phones while driving a car or operating a moving vehicle while on company business. |
| Promotes off-the-job safety for the employee and their family on topics such as fall prevention, car seat/seatbelt use and/or poisoning prevention.                  |
| Has a return to work program for injured employees.                                                                                                                  |
| Has a worksite safety committee.                                                                                                                                     |
| Injuries at the workplace                                                                                                                                            |

### Supplementary Table S2. Worksite sizes related to response rates. <sup>a</sup>

| Worksite size                   | 2010 | 2013 | 2016 | P-value |
|---------------------------------|------|------|------|---------|
| <b>Responses</b>                | N    |      |      |         |
| Small (10 to 49 employees)      | 651  | 582  | 623  | <0.001  |
| Medium (50 to 99 employees)     | 587  | 510  | 785  |         |
| Large (more than 200 employees) | 274  | 260  | 200  |         |
| Total                           | 1512 | 1352 | 1608 |         |
| <b>Non-responses</b>            |      |      |      |         |
| Small (10 to 49 employees)      | 849  | 918  | 1387 | 0.003   |
| Medium (50 to 99 employees)     | 913  | 990  | 1225 |         |
| Large (more than 200 employees) | 229  | 263  | 325  |         |
| Total                           | 1991 | 2171 | 2937 |         |

<sup>a</sup> unweighted data

<sup>b</sup> data do not include responses and nonresponses for construction oversample and transportation and warehousing oversample strata from the 2016 survey.

**Supplementary Table S3: Testing responses of worksites associated over time with nonresponse.<sup>a</sup>**

| Worksite size | Survey year  |                |                |                |                   |                 | P-value |
|---------------|--------------|----------------|----------------|----------------|-------------------|-----------------|---------|
|               | 2010         |                | 2013           |                | 2016 <sup>b</sup> |                 |         |
|               | Responses    | Non-responses  | Responses      | Non-responses  | Responses         | Non-responses   |         |
| <b>Small</b>  | 651<br>(43%) | 849<br>(56.6%) | 582<br>(38.8%) | 918<br>(61.2%) | 623<br>(31.0%)    | 1387<br>(69.0%) | <0.0001 |
| <b>Medium</b> | 587<br>(39%) | 913<br>(60.9%) | 510<br>(34.0%) | 990<br>(66.0%) | 785<br>(39.1%)    | 1225<br>(60.9%) | <0.0001 |
| <b>Large</b>  | 274<br>(54%) | 229<br>(45.5%) | 260<br>(49.7%) | 263<br>(50.3%) | 200<br>(38.1%)    | 325<br>(61.9%)  | <0.0001 |

<sup>a</sup> unweighted data

<sup>b</sup> data do not include responses and nonresponses for construction oversample and transportation and warehousing oversample strata from the 2016 survey.

**Supplementary Table S4: Industry sector by worksite size among respondents.<sup>a</sup>**

| Industry Sector                               | Small       |            | Medium      |            | Large      |            | Total       |
|-----------------------------------------------|-------------|------------|-------------|------------|------------|------------|-------------|
|                                               | n           | %          | n           | %          | n          | %          |             |
| Health Care and Social Assistance             | 286         | 33%        | 460         | 53%        | 118        | 14%        | 864         |
| Wholesale and Retail Trade                    | 374         | 53%        | 232         | 33%        | 97         | 14%        | 703         |
| Information, Finance, and Management Services | 275         | 45%        | 231         | 38%        | 107        | 17%        | 613         |
| Other Services                                | 362         | 58%        | 224         | 36%        | 43         | 7%         | 629         |
| Educational Services                          | 91          | 19%        | 304         | 63%        | 85         | 18%        | 480         |
| Construction                                  | 238         | 72%        | 74          | 22%        | 18         | 5%         | 330         |
| Manufacturing                                 | 111         | 23%        | 228         | 47%        | 142        | 30%        | 481         |
| Public Administration                         | 91          | 28%        | 177         | 55%        | 55         | 17%        | 323         |
| Transportation and Warehousing                | 137         | 62%        | 73          | 33%        | 12         | 5%         | 222         |
| All Other Sectors                             | 61          | 53%        | 33          | 28%        | 22         | 19%        | 116         |
| NEC or Unknown                                | 11          | 48%        | 8           | 35%        | 4          | 17%        | 23          |
| <b>Total</b>                                  | <b>2037</b> | <b>43%</b> | <b>2044</b> | <b>43%</b> | <b>703</b> | <b>15%</b> | <b>4784</b> |

<sup>a</sup> unweighted data
